# Supplementary material
Source: HighWire-hosted journal article supplement (https://www.cmaj.ca/highwire/filestream/60024/field_highwire_adjunct_files/7/161379-res-7-at.pdf)
Supplement: 161379-res-7-at.pdf [file 161379-res-7-at.pdf]

**Appendix 7 (as supplied by the authors): p16 positivity over time by province using complete-case data**

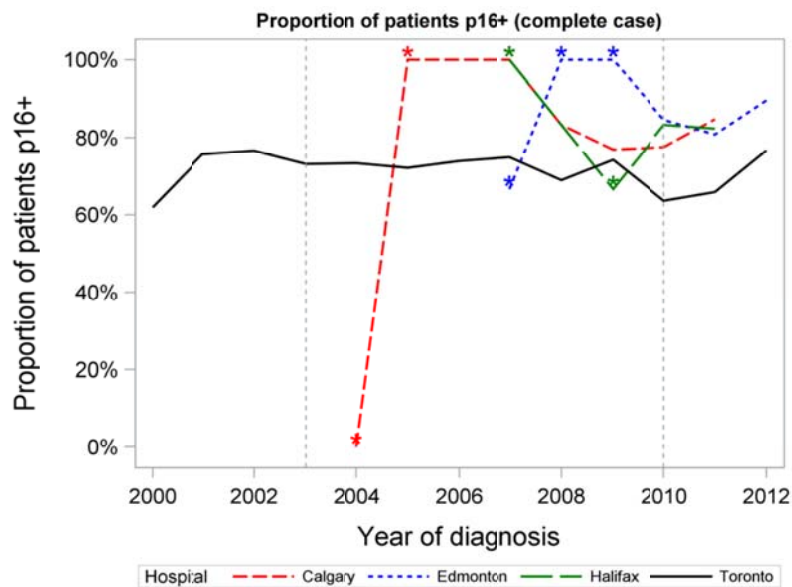

**Caption:** Proportion of oropharyngeal cancers that were p16+ over time across centres using the complete-case population (n=1282). \*Less than 10% of patients tested for p16.
